# Supplementary material
Source: PubMed Central journal article supplement (PMC5501311)
Supplement: NIHMS73310-supplement-Supplementary_material.pdf [file NIHMS73310-supplement-Supplementary_material.pdf]

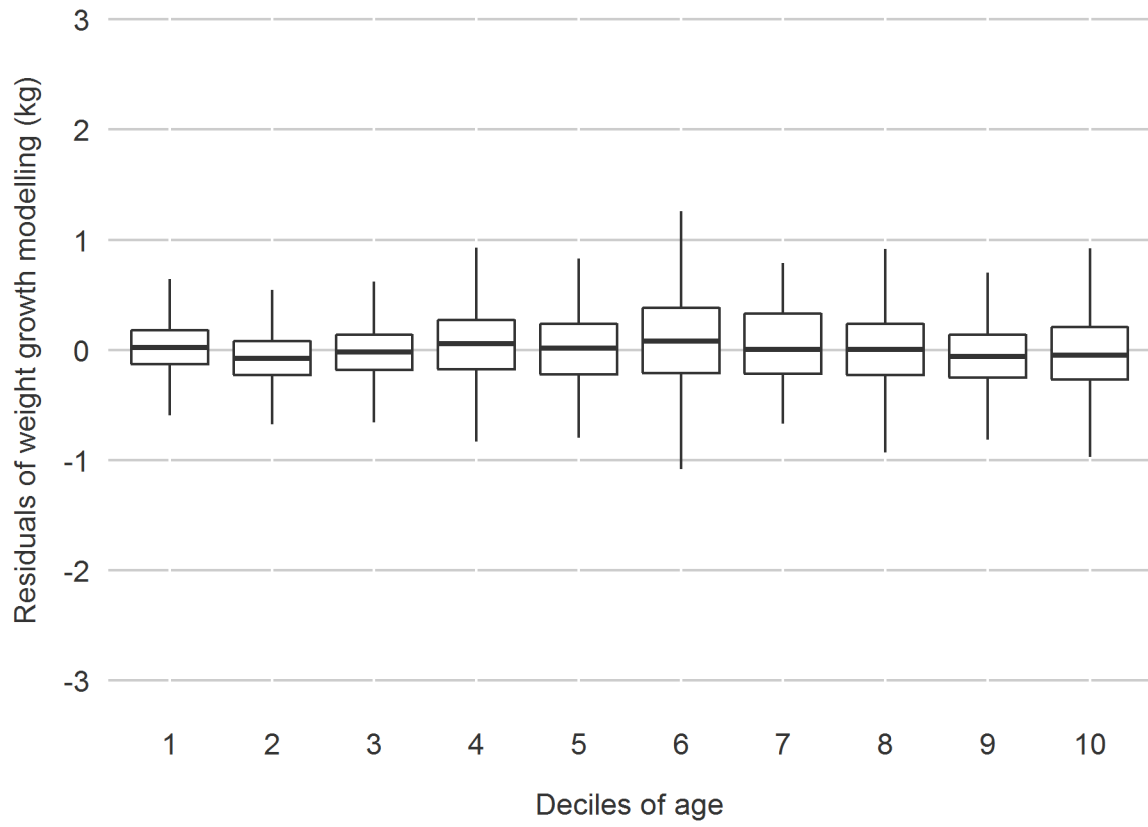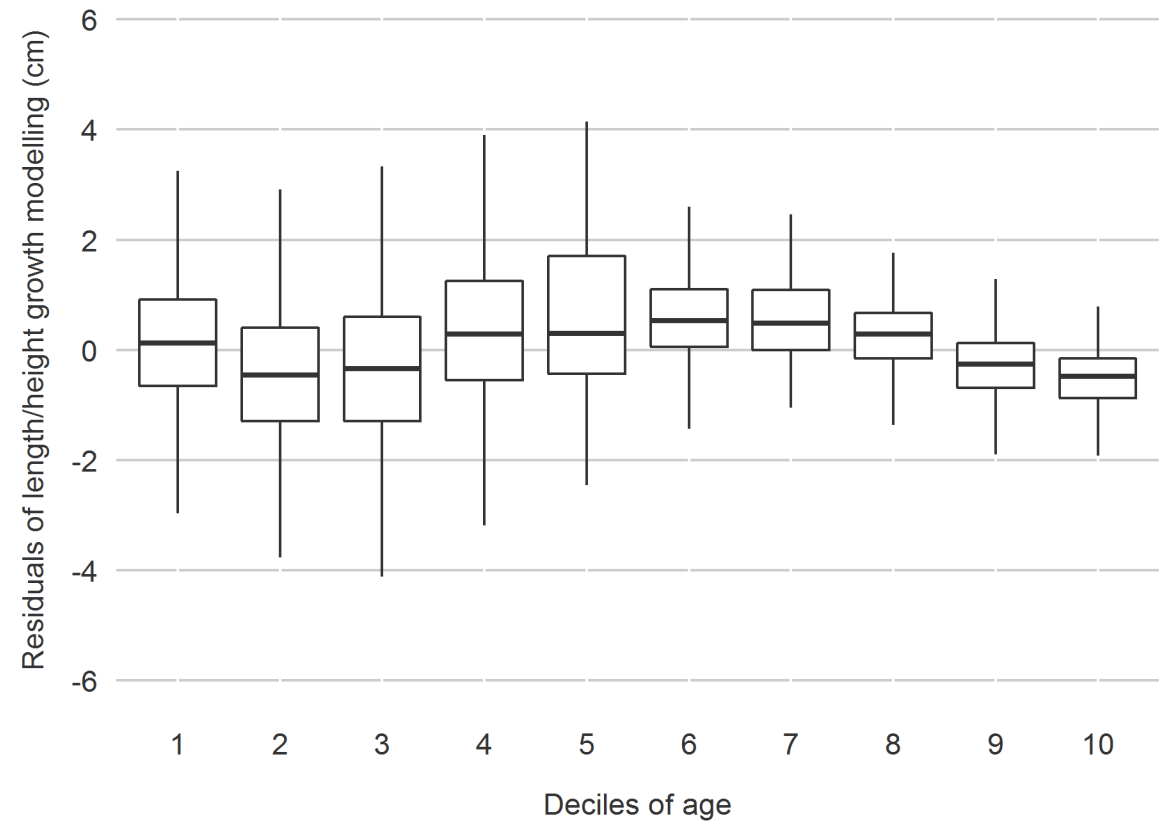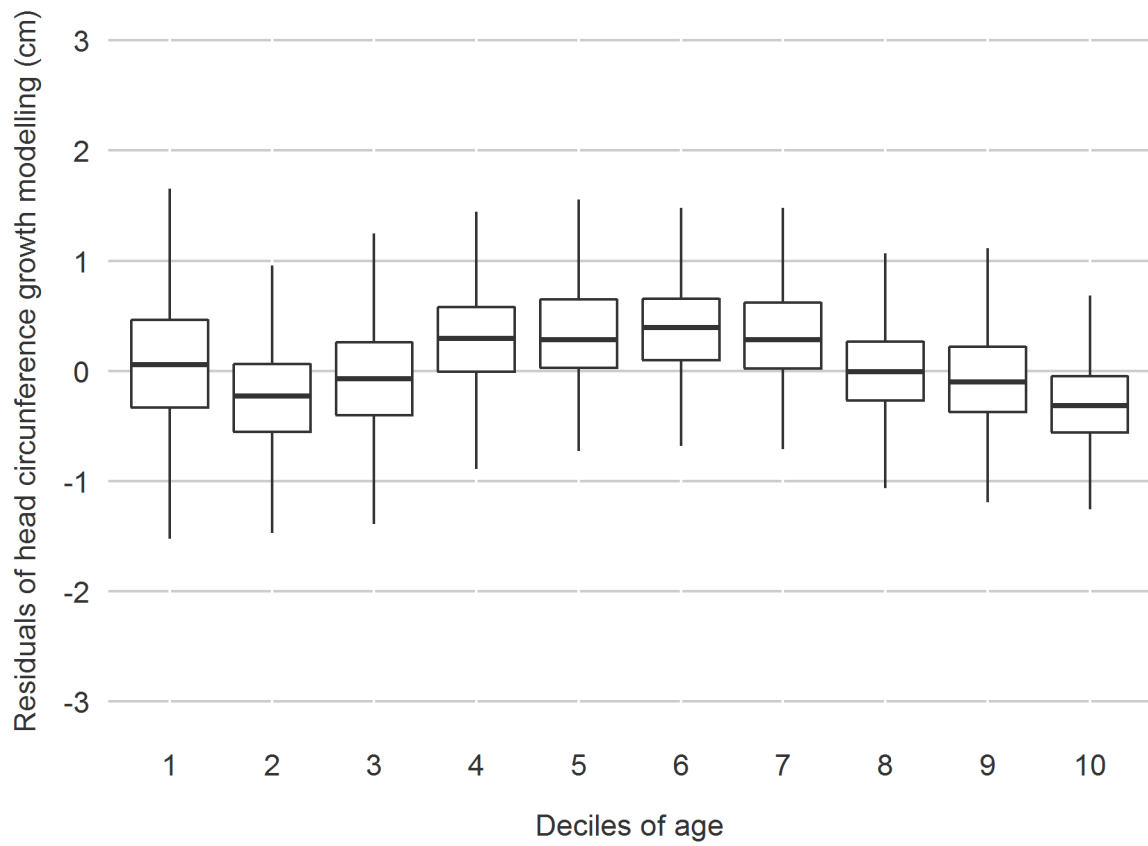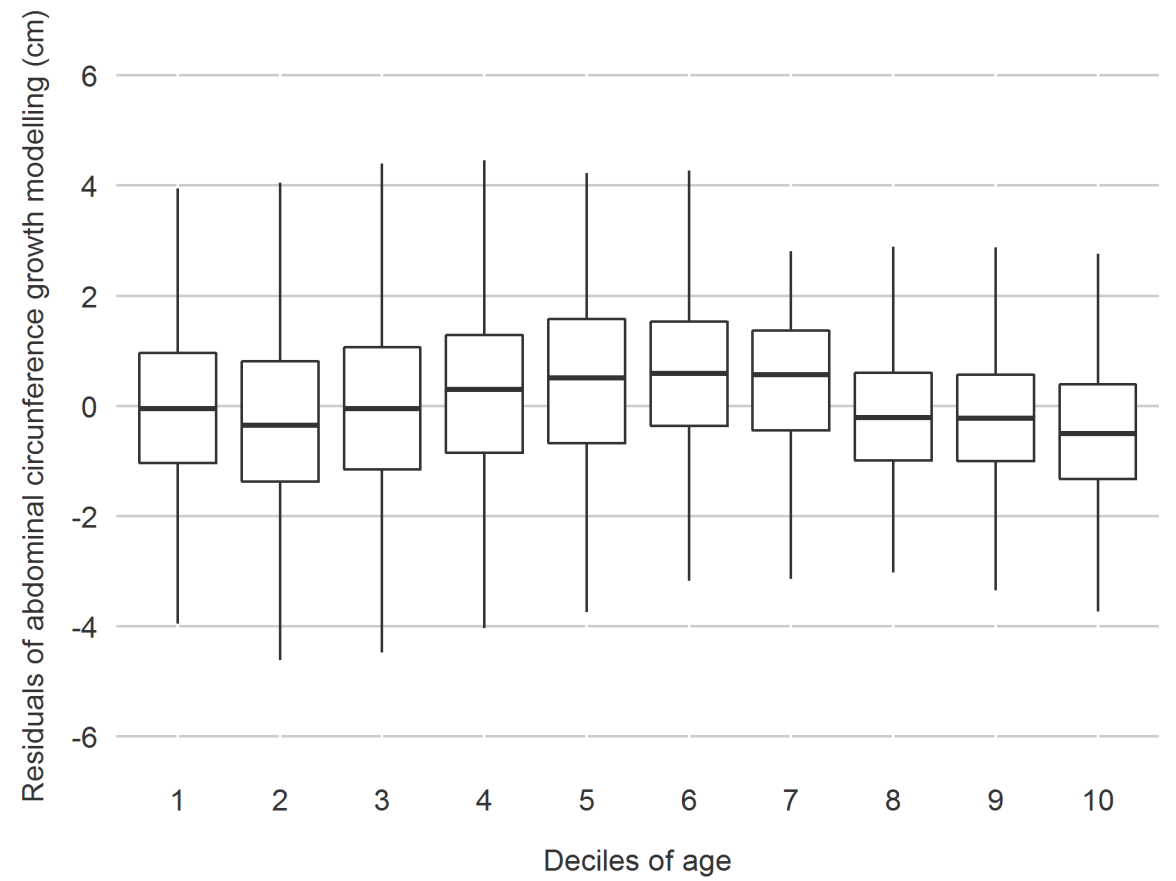

**Supplemental Table 1.** Number of anthropometric measures used for modelling growth in weight, length/height, head circumference and abdominal circumference between birth and 5 years in children from the GUSTO cohort

| Outcomes                       | Measures | Subjects | Measures per Subject |
|--------------------------------|----------|----------|----------------------|
| <b>Weight</b>                  |          |          |                      |
| < 3 months                     | 1778     | 949      | 2 (1-4)              |
| 3 months - 12 months           | 2589     | 940      | 3 (1-5)              |
| 12 months - 18 months          | 1581     | 889      | 2 (1-3)              |
| 18 months - 36 months          | 1616     | 879      | 2 (1-3)              |
| ≥ 36 months                    | 2919     | 876      | 3 (1-4)              |
| Total study period             | 10483    | 979      | 12 (1-14)            |
| <b>Length/Height</b>           |          |          |                      |
| < 3 months                     | 2754     | 979      | 3 (1-5)              |
| 3 months - 12 months           | 2561     | 940      | 3 (1-5)              |
| 12 months - 18 months          | 1726     | 880      | 2 (1-4)              |
| 18 months - 36 months          | 2599     | 872      | 3 (1-5)              |
| ≥ 36 months                    | 2925     | 877      | 4 (1-4)              |
| Total study period             | 12565    | 979      | 14 (1-18)            |
| <b>Head Circumference</b>      |          |          |                      |
| < 3 months                     | 2747     | 978      | 3 (1-5)              |
| 3 months - 12 months           | 2551     | 940      | 3 (1-5)              |
| 12 months - 18 months          | 1584     | 889      | 2 (1-3)              |
| 18 months - 36 months          | 1592     | 879      | 2 (1-3)              |
| ≥ 36 months                    | 2918     | 877      | 4 (1-4)              |
| Total study period             | 11392    | 979      | 13 (1-16)            |
| <b>Abdominal Circumference</b> |          |          |                      |
| < 3 months                     | 2709     | 973      | 3 (1-5)              |
| 3 months - 12 months           | 2553     | 940      | 3 (1-5)              |
| 12 months - 18 months          | 1571     | 889      | 2 (1-3)              |
| 18 months - 36 months          | 1551     | 867      | 2 (1-3)              |
| ≥ 36 months                    | 2893     | 876      | 3 (1-4)              |
| Total study period             | 11277    | 979      | 12 (1-16)            |

**Supplemental Table 2.** Descriptive statistics of the parameters *a*, *b*, *c* and *d* resulting from the Jenss-Bayley growth modelling of weight, length/height, head circumference and abdominal circumference between birth and 5 years in children from the GUSTO cohort (*n* = 979)

| Parameters                     | Deciles         |                 |                 |                 |                 |                 |                 |                 |                 | Mean  | SD   |
|--------------------------------|-----------------|-----------------|-----------------|-----------------|-----------------|-----------------|-----------------|-----------------|-----------------|-------|------|
|                                | 1 <sup>st</sup> | 2 <sup>nd</sup> | 3 <sup>rd</sup> | 4 <sup>th</sup> | 5 <sup>th</sup> | 6 <sup>th</sup> | 7 <sup>th</sup> | 8 <sup>th</sup> | 9 <sup>th</sup> |       |      |
| <b>Weight</b>                  |                 |                 |                 |                 |                 |                 |                 |                 |                 |       |      |
| <i>a</i>                       | 0.95            | 0.98            | 1.01            | 1.02            | 1.04            | 1.05            | 1.07            | 1.09            | 1.12            | 1.03  | 0.07 |
| <i>b</i>                       | -5.45           | -5.38           | -5.31           | -5.25           | -5.19           | -5.14           | -5.07           | -4.98           | -4.80           | -5.16 | 0.27 |
| <i>c</i>                       | 1.22            | 1.35            | 1.42            | 1.47            | 1.53            | 1.58            | 1.64            | 1.71            | 1.80            | 1.52  | 0.25 |
| <i>d</i>                       | -5.11           | -4.95           | -4.83           | -4.73           | -4.64           | -4.56           | -4.46           | -4.33           | -4.13           | -4.63 | 0.45 |
| <b>Length/Height</b>           |                 |                 |                 |                 |                 |                 |                 |                 |                 |       |      |
| <i>a</i>                       | 3.85            | 3.87            | 3.88            | 3.89            | 3.90            | 3.91            | 3.92            | 3.93            | 3.94            | 3.90  | 0.04 |
| <i>b</i>                       | -4.00           | -3.96           | -3.94           | -3.91           | -3.90           | -3.88           | -3.86           | -3.84           | -3.80           | -3.90 | 0.08 |
| <i>c</i>                       | 2.97            | 3.02            | 3.06            | 3.09            | 3.11            | 3.13            | 3.16            | 3.19            | 3.24            | 3.11  | 0.10 |
| <i>d</i>                       | -5.46           | -5.38           | -5.32           | -5.27           | -5.23           | -5.18           | -5.14           | -5.09           | -5.03           | -5.24 | 0.17 |
| <b>Head Circumference</b>      |                 |                 |                 |                 |                 |                 |                 |                 |                 |       |      |
| <i>a</i>                       | 3.48            | 3.50            | 3.51            | 3.52            | 3.52            | 3.53            | 3.54            | 3.55            | 3.56            | 3.52  | 0.03 |
| <i>b</i>                       | -6.08           | -6.04           | -6.02           | -6.00           | -5.98           | -5.95           | -5.93           | -5.90           | -5.85           | -5.97 | 0.10 |
| <i>c</i>                       | 2.38            | 2.42            | 2.44            | 2.47            | 2.48            | 2.50            | 2.52            | 2.55            | 2.58            | 2.48  | 0.08 |
| <i>d</i>                       | -5.19           | -5.13           | -5.09           | -5.06           | -5.02           | -5.00           | -4.96           | -4.92           | -4.86           | -5.03 | 0.13 |
| <b>Abdominal Circumference</b> |                 |                 |                 |                 |                 |                 |                 |                 |                 |       |      |
| <i>a</i>                       | 3.22            | 3.24            | 3.25            | 3.26            | 3.28            | 3.29            | 3.30            | 3.32            | 3.36            | 3.28  | 0.06 |
| <i>b</i>                       | -5.49           | -5.37           | -5.29           | -5.21           | -5.14           | -5.07           | -4.98           | -4.85           | -4.63           | -5.09 | 0.36 |
| <i>c</i>                       | 2.45            | 2.51            | 2.56            | 2.59            | 2.63            | 2.67            | 2.71            | 2.76            | 2.83            | 2.64  | 0.15 |
| <i>d</i>                       | -4.54           | -4.28           | -4.11           | -3.98           | -3.87           | -3.77           | -3.62           | -3.45           | -3.26           | -3.88 | 0.52 |

**Supplemental Table 3.** Estimates of fixed effects, and correlation matrix of random effects, resulting from the Jenss-Bayley modelling of weight, length/height, head circumference and abdominal circumference between birth and 5 years in children from the GUSTO cohort<sup>1</sup>

| Parameters                     | Fixed effects | Correlation matrix of random effects |          |          |
|--------------------------------|---------------|--------------------------------------|----------|----------|
|                                | Mean (SE)     | <i>b</i>                             | <i>c</i> | <i>d</i> |
| <b>Weight</b>                  |               |                                      |          |          |
| <i>a</i>                       | 1.04 (0.007)  | 0.63                                 | 0.98     | 0.75     |
| <i>b</i>                       | 5.18 (0.01)   | 1.00                                 | 0.49     | 0.67     |
| <i>c</i>                       | 1.53 (0.01)   | -                                    | 1.00     | 0.73     |
| <i>d</i>                       | 4.65 (0.021)  | -                                    | -        | 1.00     |
| RSD                            | 0.48 (0.004)  | -                                    | -        | -        |
| <b>Length/Height</b>           |               |                                      |          |          |
| <i>a</i>                       | 3.9 (0.001)   | -0.10                                | -0.11    | 0.11     |
| <i>b</i>                       | 3.9 (0.004)   | 1.00                                 | 0.22     | 0.30     |
| <i>c</i>                       | 3.1 (0.005)   | -                                    | 1.00     | 0.49     |
| <i>d</i>                       | 5.2 (0.009)   | -                                    | -        | 1.00     |
| RSD                            | 1.3 (0.009)   | -                                    | -        | -        |
| <b>Head Circumference</b>      |               |                                      |          |          |
| <i>a</i>                       | 3.52 (0.001)  | 0.15                                 | -0.34    | 0.14     |
| <i>b</i>                       | 5.97 (0.009)  | 1.00                                 | 0.18     | 0.53     |
| <i>c</i>                       | 2.48 (0.004)  | -                                    | 1.00     | 0.04     |
| <i>d</i>                       | 5.02 (0.008)  | -                                    | -        | 1.00     |
| RSD                            | 0.67 (0.005)  | -                                    | -        | -        |
| <b>Abdominal Circumference</b> |               |                                      |          |          |
| <i>a</i>                       | 3.3 (0.005)   | 0.34                                 | -0.35    | 0.77     |
| <i>b</i>                       | 5.1 (0.015)   | 1.00                                 | 0.25     | 0.46     |
| <i>c</i>                       | 2.6 (0.01)    | -                                    | 1.00     | -0.15    |
| <i>d</i>                       | 4 (0.028)     | -                                    | -        | 1.00     |
| RSD                            | 1.9 (0.014)   | -                                    | -        | -        |

<sup>1</sup>RSD, residuals standard deviation; SE, standard error.

**Supplemental Table 4.** Main characteristics of the studied mother-offspring pairs<sup>1</sup>

|                                           | % (n) or M ± SD |
|-------------------------------------------|-----------------|
| Study centre, % NUH                       | 26.1 (257)      |
| Familial characteristics                  |                 |
| Ethnicity, % Chinese                      | 54.3 (535)      |
| Ethnicity, % Malay                        | 26.6 (262)      |
| Incomes, % < 2000 SGD                     | 14.6 (144)      |
| Incomes, % ≥ 6000 SGD                     | 26.3 (259)      |
| Maternal characteristics                  |                 |
| Education, % University diploma           | 33.8 (333)      |
| Age, y                                    | 31.1 ± 5.1      |
| Height, cm                                | 158.2 ± 5.7     |
| Pre-pregnancy BMI, kg/m <sup>2</sup>      | 22.7 ± 4.4      |
| Gestational weight gain at 26-28 wk, kg   | 8.7 ± 4.5       |
| Fasting glucose level at 26-28 wk, mmol/L | 4.34 ± 0.45     |
| Vitamin D level at 26-28 wk, nmol/L       | 80.9 ± 26.6     |
| Paternal characteristics                  |                 |
| Height, cm                                | 170.8 ± 6.2     |
| BMI, kg/m <sup>2</sup>                    | 25.9 ± 4.9      |
| Offspring characteristics                 |                 |
| Sex, % male                               | 51.9 (511)      |
| Parity, % first born                      | 42.3 (417)      |
| Gestational age at birth, wk              | 38.8 ± 1.4      |
| Born very preterm (< 33 wk), %            | 0.7 (7)         |
| Born late preterm (33-36 wk), %           | 6.3 (62)        |

<sup>1</sup>n = 985, except for paternal height (n = 811) and BMI (n = 804). NUH, national university hospital; SGD, Singapore dollars.

**Supplemental Table 5.** Descriptive statistics of main offspring anthropometric, adiposity and body composition outcomes in the GUSTO cohort

| Outcomes                                    | <i>n</i> | Mean  | SD   | Minimum | Maximum |
|---------------------------------------------|----------|-------|------|---------|---------|
| Anthropometrics at 26 weeks' gestation      |          |       |      |         |         |
| Estimated fetal weight, kg                  | 924      | 1.0   | 0.2  | 0.6     | 2.1     |
| Femur length, cm                            | 924      | 4.9   | 0.3  | 4.1     | 6.2     |
| Anthropometrics at 32 weeks' gestation      |          |       |      |         |         |
| Estimated fetal weight, kg                  | 924      | 2.0   | 0.3  | 1.1     | 3.0     |
| Femur length, cm                            | 924      | 6.1   | 0.3  | 5.0     | 7.1     |
| Anthropometrics at birth                    |          |       |      |         |         |
| Weight, kg                                  | 977      | 3.1   | 0.5  | 1.2     | 5.4     |
| Length, cm                                  | 977      | 48.7  | 2.3  | 34.0    | 57.0    |
| Head circumference, cm                      | 975      | 33.4  | 1.4  | 25.0    | 37.5    |
| Abdominal circumference, cm                 | 935      | 28.4  | 2.4  | 21.3    | 38.0    |
| Triceps skinfold thickness, mm              | 937      | 5.4   | 1.3  | 3.0     | 10.4    |
| Subscapular skinfold thickness, mm          | 936      | 4.9   | 1.2  | 2.2     | 10.4    |
| Body composition at 10 days                 |          |       |      |         |         |
| Fat Mass, %                                 | 252      | 11.5  | 4.5  | 1.2     | 25.8    |
| Abdominal adipose tissue volumes at 10 days |          |       |      |         |         |
| Superficial Subcutaneous, mL                | 317      | 77.9  | 21.8 | 36.3    | 174.5   |
| Deep Subcutaneous, mL                       | 317      | 13.3  | 5.6  | 3.5     | 38.4    |
| Internal, mL                                | 317      | 22.8  | 7.6  | 7.2     | 64.3    |
| Anthropometrics at 54 months                |          |       |      |         |         |
| Weight, kg                                  | 794      | 17.4  | 3.0  | 12.2    | 33.5    |
| Height, cm                                  | 805      | 105.6 | 4.4  | 91.0    | 120.1   |
| Head circumference, cm                      | 802      | 50.2  | 1.5  | 45.4    | 55.0    |
| Abdominal circumference, cm                 | 797      | 51.7  | 4.8  | 40.0    | 75.4    |
| Triceps skinfold thickness, mm              | 785      | 10.1  | 3.1  | 3.8     | 28.3    |
| Subscapular skinfold thickness, mm          | 786      | 7.5   | 3.3  | 3.6     | 30.2    |

**Supplemental Table 6.** Adjusted associations of maternal plasma PUFA ratios during pregnancy with the standardized parameters *a*, *b*, *c* and *d* resulting from the Jenss-Bayley growth modelling of weight, length/height, head circumference and abdominal circumference between birth and 5 years in children from the GUSTO cohort. (*n* = 979)<sup>1</sup>

| Fatty acids                                                         | Weight                                | Length/Height             | HC                        | AC                         |
|---------------------------------------------------------------------|---------------------------------------|---------------------------|---------------------------|----------------------------|
| Parameter <i>a</i> (model-predicted measure at birth <sup>2</sup> ) |                                       |                           |                           |                            |
| LA/ALA                                                              | 0.0001 (-0.0001, 0.0004) <sup>3</sup> | 0.0004 (-0.0001, 0.0009)  | 0.0003 (-0.0002, 0.0008)  | 0.0004 (-0.0002, 0.0009)   |
| AA/DHA                                                              | -0.03 (-0.08, 0.01)                   | -0.08 (-0.16, 0.01)       | -0.04 (-0.13, 0.05)       | 0.08 (-0.02, 0.18)         |
| Total n-6/n-3 PUFA                                                  | 0.00 (-0.02, 0.01)                    | -0.01 (-0.04, 0.01)       | 0.00 (-0.03, 0.02)        | 0.01 (-0.02, 0.04)         |
| Total n-6/n-3 LCPUFA                                                | -0.02 (-0.06, 0.01)                   | -0.05 (-0.12, 0.02)       | -0.06 (-0.13, 0.02)       | 0.05 (-0.03, 0.13)         |
| Parameter <i>b</i> (growth velocity beyond 2-3 years)               |                                       |                           |                           |                            |
| LA/ALA                                                              | -0.0001 (-0.0007, 0.0004)             | -0.0003 (-0.0008, 0.0003) | -0.0004 (-0.0010, 0.0002) | 0 (-0.0005, 0.0006)        |
| AA/DHA                                                              | -0.17 (-0.26, -0.07)                  | -0.09 (-0.19, 0.01)       | -0.06 (-0.17, 0.05)       | -0.17 (-0.27, -0.07)       |
| Total n-6/n-3 PUFA                                                  | -0.03 (-0.06, 0.00)                   | -0.02 (-0.05, 0.01)       | -0.01 (-0.04, 0.03)       | -0.05 (-0.08, -0.02)       |
| Total n-6/n-3 LCPUFA                                                | -0.10 (-0.18, -0.03)                  | -0.06 (-0.14, 0.02)       | -0.04 (-0.12, 0.05)       | -0.13 (-0.21, -0.05)       |
| Parameter <i>c</i> (growth spurt before 2-3 years)                  |                                       |                           |                           |                            |
| LA/ALA                                                              | 0.0001 (-0.0004, 0.0007)              | 0.0004 (-0.0002, 0.001)   | -0.0003 (-0.0009, 0.0003) | -0.0007 (-0.0013, -0.0002) |
| AA/DHA                                                              | 0.01 (-0.08, 0.11)                    | -0.02 (-0.12, 0.08)       | 0.06 (-0.04, 0.16)        | -0.05 (-0.15, 0.05)        |
| Total n-6/n-3 PUFA                                                  | 0.00 (-0.03, 0.03)                    | -0.01 (-0.04, 0.02)       | 0.00 (-0.03, 0.03)        | 0.01 (-0.02, 0.04)         |
| Total n-6/n-3 LCPUFA                                                | 0.01 (-0.07, 0.09)                    | -0.02 (-0.10, 0.06)       | 0.04 (-0.04, 0.13)        | -0.01 (-0.08, 0.07)        |
| Parameter <i>d</i> (deceleration rate before 2-3 years)             |                                       |                           |                           |                            |
| LA/ALA                                                              | -0.0002 (-0.0008, 0.0004)             | -0.0004 (-0.0009, 0.0002) | -0.0002 (-0.0007, 0.0004) | -0.0002 (-0.0007, 0.0004)  |
| AA/DHA                                                              | -0.12 (-0.22, -0.02)                  | 0.02 (-0.08, 0.12)        | -0.02 (-0.12, 0.08)       | -0.13 (-0.23, -0.03)       |
| Total n-6/n-3 PUFA                                                  | -0.01 (-0.04, 0.02)                   | 0.02 (-0.02, 0.05)        | 0.00 (-0.03, 0.04)        | -0.02 (-0.05, 0.01)        |
| Total n-6/n-3 LCPUFA                                                | -0.07 (-0.15, 0.01)                   | 0.02 (-0.06, 0.10)        | 0.00 (-0.08, 0.08)        | -0.10 (-0.18, -0.02)       |

<sup>1</sup> Models were adjusted for study center, ethnicity, child's sex, familial income, maternal education and age, parity, fasting glucose levels, vitamin D levels, gestational weight gain at 26-28 weeks' gestation, maternal height and pre-pregnancy BMI, paternal height and BMI. AA, arachidonic acid; AC, abdominal circumference; ALA,  $\alpha$ -linolenic acid; DHA, docosahexaenoic acid; HC, head circumference; LA, linoleic acid; LCPUFA, long-chain polyunsaturated fatty acids; PUFA, polyunsaturated fatty acids.

<sup>2</sup> Except for parameter *a* for weight which is not interpretable (see Methods), and was replaced by measured birth weight.

<sup>3</sup>  $\beta$  coefficient (95% CI) are expressed in SD unit per increase in PUFA ratio.

**Supplemental Table 7.** Adjusted associations of maternal plasma PUFA levels during pregnancy with body composition in neonates from the GUSTO cohort<sup>1</sup>

| Fatty acids, % | PEA POD at birth ( <i>n</i> = 302) |                     |                       | PEA POD at 10 days ( <i>n</i> = 252) |                     |                       |
|----------------|------------------------------------|---------------------|-----------------------|--------------------------------------|---------------------|-----------------------|
|                | Fat Free Mass, kg                  | Fat Mass, kg        | Fat Mass, %           | Fat Free Mass, kg                    | Fat Mass, kg        | Fat Mass, %           |
| 18:2n-6 (LA)   | 0.06 (0.02, 0.10) <sup>2</sup>     | 0.01 (-0.01, 0.03)  | 0.14 (-0.40, 0.67)    | 0.07 (0.02, 0.12)                    | 0.02 (-0.01, 0.05)  | 0.25 (-0.52, 1.02)    |
| 20:4n-6 (AA)   | -0.01 (-0.12, 0.09)                | -0.02 (-0.07, 0.03) | -0.40 (-1.75, 0.94)   | 0.00 (-0.12, 0.11)                   | 0.02 (-0.05, 0.09)  | 0.52 (-1.19, 2.23)    |
| Σn-6 PUFA      | 0.06 (0.01, 0.10)                  | 0.01 (-0.01, 0.03)  | 0.18 (-0.37, 0.74)    | 0.06 (0.00, 0.12)                    | 0.02 (-0.01, 0.05)  | 0.31 (-0.51, 1.12)    |
| Σn-6 LCPUFA    | -0.03 (-0.11, 0.05)                | 0.00 (-0.04, 0.04)  | 0.15 (-0.86, 1.16)    | -0.04 (-0.13, 0.05)                  | 0.00 (-0.05, 0.05)  | 0.10 (-1.16, 1.36)    |
| 18:3n-3 (ALA)  | -0.43 (-1.64, 0.78)                | -0.07 (-0.66, 0.52) | -0.67 (-16.25, 14.91) | -0.58 (-2.12, 0.95)                  | -0.59 (-1.44, 0.26) | -14.18 (-36.15, 7.79) |
| 20:5n-3 (EPA)  | -0.11 (-0.40, 0.18)                | -0.01 (-0.15, 0.13) | 0.17 (-3.52, 3.87)    | -0.04 (-0.36, 0.28)                  | -0.11 (-0.29, 0.06) | -2.89 (-7.42, 1.64)   |
| 22:6n-3 (DHA)  | 0.06 (-0.05, 0.18)                 | 0.00 (-0.06, 0.06)  | -0.12 (-1.64, 1.41)   | 0.06 (-0.08, 0.20)                   | -0.02 (-0.09, 0.06) | -0.45 (-2.47, 1.58)   |
| Σn-3 PUFA      | 0.03 (-0.06, 0.12)                 | 0.01 (-0.04, 0.05)  | 0.14 (-1.02, 1.31)    | 0.04 (-0.07, 0.14)                   | -0.02 (-0.08, 0.04) | -0.64 (-2.18, 0.90)   |
| Σn-3 LCPUFA    | 0.04 (-0.06, 0.13)                 | 0.01 (-0.04, 0.05)  | 0.15 (-1.03, 1.33)    | 0.04 (-0.07, 0.15)                   | -0.02 (-0.08, 0.04) | -0.59 (-2.15, 0.98)   |

<sup>1</sup> Models were adjusted for study center, ethnicity, child's sex, familial income, maternal education and age, parity, fasting glucose levels, vitamin D levels, gestational weight gain at 26-28 weeks' gestation, maternal height and pre-pregnancy BMI, paternal height and BMI. AA, arachidonic acid; ALA,  $\alpha$ -linolenic acid; DHA, docosahexaenoic acid; EPA, eicosapentaenoic acid; LA, linoleic acid; LCPUFA, long-chain polyunsaturated fatty acids; PUFA, polyunsaturated fatty acids.

<sup>2</sup>  $\beta$  coefficient (95% CI) are expressed in outcome unit per 5% change in PUFA level.



**Supplemental Table 8.** Adjusted associations of maternal plasma PUFA levels during pregnancy with abdominal tissue volumes in neonates from the GUSTO cohort ( $n = 317$ )<sup>1</sup>

| Fatty acids, % | Total, mL                    | Superficial Subcutaneous, mL | Superficial Subcutaneous, % total | Deep Subcutaneous, mL | Deep Subcutaneous, % total | Internal, mL       | Internal, % total  |
|----------------|------------------------------|------------------------------|-----------------------------------|-----------------------|----------------------------|--------------------|--------------------|
| 18:2 n-6 (LA)  | 6.4 (1.6, 11.2) <sup>2</sup> | 4.6 (1.3, 7.8)               | -0.0 (-0.7, 0.6)                  | 0.6 (-0.22, 1.48)     | -0.1 (-0.5, 0.3)           | 1.2 (0.1, 2.4)     | 0.1 (-0.5, 0.7)    |
| 20:4 n-6 (AA)  | -0.3 (-9.7, 9.1)             | -0.5 (-6.9, 5.8)             | -0.1 (-1.4, 1.1)                  | 0.6 (-1.03, 2.25)     | 0.4 (-0.4, 1.1)            | -0.3 (-2.6, 1.9)   | -0.2 (-1.4, 0.9)   |
| Σ n-6 PUFA     | 4.5 (-0.6, 9.6)              | 3.1 (-0.4, 6.5)              | -0.1 (-0.8, 0.6)                  | 0.6 (-0.35, 1.4)      | 0.0 (-0.4, 0.4)            | 0.9 (-0.3, 2.1)    | 0.1 (-0.5, 0.8)    |
| Σ n-6 LCPUFA   | -4.9 (-12.2, 2.4)            | -3.7 (-8.6, 1.2)             | -0.1 (-1.1, 0.8)                  | -0.3 (-1.57, 0.99)    | 0.1 (-0.5, 0.65)           | -0.9 (-2.6, 0.8)   | 0.1 (-0.8, 1.0)    |
| 18:3 n-3 (ALA) | -65.3 (-188.8, 58.3)         | -37.1 (-120.8, 46.5)         | 5.5 (-10.9, 21.8)                 | -1.0 (-22.7, 20.7)    | 8.2 (-1.5, 17.9)           | -27.2 (-56.5, 2.1) | -13.7 (-28.7, 1.4) |
| 20:5 n-3 (EPA) | -25.7 (-52.6, 1.3)           | -16.9 (-35.1, 1.4)           | 0.3 (-3.3, 3.8)                   | -2.1 (-6.85, 2.6)     | 0.8 (-1.4, 2.9)            | -6.7 (-13.1, -0.3) | -1.0 (-4.3, 2.3)   |
| 22:6 n-3 (DHA) | 5.2 (-7.2, 17.7)             | 5.2 (-3.6, 13.6)             | 1.1 (-0.6, 2.7)                   | 1.3 (-0.91, 3.4)      | 0.8 (-0.2, 1.8)            | -1.3 (-4.2, 1.67)  | -1.9 (-3.4, -0.4)  |
| Σ n-3 PUFA     | -1.4 (-10.8, 8.0)            | 0.1 (-6.3, 6.5)              | 0.7 (-0.6, 1.9)                   | 0.4 (-1.2, 2.1)       | 0.7 (-0.1, 1.4)            | -1.9 (-4.1, 0.3)   | -1.3 (-2.5, -0.2)  |
| Σ n-3 LCPUFA   | -1.0 (-10.5, 8.5)            | 0.4 (-6.1, 6.8)              | 0.6 (-0.6, 1.9)                   | 0.4 (-1.2, 2.1)       | 0.6 (-0.1, 1.4)            | -1.8 (-4.0, 0.5)   | -1.3 (-2.4, -0.1)  |

<sup>1</sup> Models were adjusted for study center, ethnicity, child's sex, familial income, maternal education and age, parity, fasting glucose levels, vitamin D levels, gestational weight gain at 26-28 weeks' gestation, maternal height and pre-pregnancy BMI, paternal height and BMI. AA, arachidonic acid; ALA,  $\alpha$ -linolenic acid; DHA, docosahexaenoic acid; EPA, eicosapentaenoic acid; LA, linoleic acid; LCPUFA, long-chain polyunsaturated fatty acids; PUFA, polyunsaturated fatty acids.

<sup>2</sup>  $\beta$  coefficient (95% CI) are expressed in outcome unit per 5% change in PUFA level.
